# Supplementary material for: Microsatellites as DNA markers in cultivated peanut (Arachis hypogaea L.)
Source: Springer Nature journal article supplement (doi:10.1186/1471-2229-3-3), 2003-04-24
Supplement: Additional file 1 [file 1471-2229-3-3-s1.doc]

Additional File 1. List of peanut microsatellite (PM) markers

GenBank

Name Primer 5’-3’ Repeat motif accession number

PM1-F: TTCATCACCTTCACACAACACA (CTT)5 AY237736

PM1-R: TGCTTTTACCACACCAAACTT

PM2-F: GAGGCCTTTACATCCCTGCT (GAA)(GGA)3(GAA) AY237737

PM2-R: AGCTCTTGCTGTGGCTAGGA

PM3-F: P* GAAAGAAATTATACACTCCAATTATGC (GA)14 AY237738

PM3-R: CGGCATGACAGCTCTATGTT

PM8-F: ACATGTGCAAGAGGTGGTGA (T)6, (CT)4 AY237739

PM8-R: TCTGACTCAAAAGAAAGTTGAAAGA

PM10-F: TGCCAATAGAGGTTTATATGGCTAC (CT)7CC(CT)17 AY237740

PM10-R: CGATGATGACCAAGGCAAC

PM14-F: TGCCAATAGAGGTTTATATGGCTAC (GA)6A(GA)4 AY237741

PM14-R: CGATGATGACCAAGGCAAC

PM15-F: P CCTTTTCTAACACATTCACACATGA (GAAA)3(GA)8, (GA)9 AY237742

PM15-R: GGCTCCCTTCGATGATGAC

PM18-F: CGCTGTAGAGTGTAACCGTTTG (AT)3, (GAA)3 AY237743

PM18-R: AGGTTGCTCTCTCTGGGACA

PM22-F: GTGGCACCCAAACTCAAAAC (CT)16 AY237744

PM22-R: ATCAACTACCGTGCCTTTGC

PM23-F: AGCCTGAGGGATGGACTGAT (GT)6 AY237745

PM23-R: GCTCATGAACATTTATGCCACA

PM24-F: CGGAAGCGGAAGTTATGTTT (GA)15 AY237746

PM24-R: CCGAAAGGTATGAGACCCAAT

PM32-F: P AGTGTTGGGTGTGAAAGTGG (CT)15 AY237747

PM32-R: GGGACTCGGAACAGTGTTTATC

PM35-F: P TGTGAAACCAAATCACTTTCATTC (GA)18(GAA)2 AY237748

PM35-R: TGGTGAAAAGAAAGGGGAAA

PM36-F: P ACTCGCCATAGCCAACAAAC (GA)18 AY237749

PM36-R: CATTCCCACAACTCCCACAT

PM37-F: GGTGGTGACTGTGGTGGTTT (GA)20GG(GA)4 AY237750

PM37-R: TTCTATCTCTCTCCCTCTCTCTCTC

PM41-F: GCAAATCATAACCCGATCCA (GA)15 AY237751

PM41-R: CTCTCTTTCTTGCTTCTTTGGTG

PM42-F: P ACGGGCCAAGTGAAGTGAT (GA)4AA(GA)14 AY237752

PM42-R: TCTTGCTTCTTTGGTGATTAGC

PM45-F: P TGAGTTGTGACGGCTTGTGT (GA)16 AY237754

PM45-R: GATGCATGTTTAGCACACTTGA

PM49-F: AGTGCATCCCATTGATTTGC (CT)8TT(CT)6 AY237755

PM49-R: TGTACCAAATATTGGACAAAAAGAA

PM50-F: P CAATTCATGATAGTATTTTATTGGACA (GA)19 AY237756

PM50-R: CTTTCTCCTCCCCAATTTGA

PM53-F: P CCTATCCTATGGGTCACTAGCC (AT)2T(AT)2 AY237757

PM53-R: GCTTGTGCTCATCTTGAGTTTT

PM65-F: P GGACGTCTGGCTGCTAGAGA (CT)12 AY237758

PM65-R: TCGGCATCAAAACAGTGAGA

PM106-F: TGCATTGTGCTTGAACTTCC (CT)41 AY237760

PM106-R: AGCAAGCAGAGAGCAAAGAGA

PM112-F: GCAACGTTCATATTTCTTTTGTCTT (GA)10 AY237761

PM112-R: TCTTTGGTGACTAGCTTGGTGA

PM119-F: CGGTAAATCCGCTAGCAAAA (CTCACT)5 AY237762

PM119-R: GGGTGAGAGACTAAGAGTGAGAGTG

PM120-F: TGTGTGAATGTGGAGGATGAA (GA)6(GT)5, (GA)6, (GA)6 AY237763

PM120-R: ATGGATCCAACGGTTACCAA

PM133-F: TTTATGCTATGGCTGTCTTGAG (GA)3 AY237764

PM133-R: TGCTATCCCAACTTGGAAGG

PM136-F: CTTCTTCCCCGTAGGGTAGC (CT)4TT(CT)4, AY237765

PM136-R: AGCACCCATTGTTACTGCTG (CT)10(CA)9(CT)5

PM137-F: P AACCAATTCAACAAACCCAGT (GA)19 AY237766

PM137-R: GAAGATGGATGAAAACGGATG

PM145-F: P GCTGTAATTAGGATCATTCCACA (CT)12(CA)2(CT)4(CA)9 AY237767

PM145-R: CAACGGTTGGATCGATGA

PM156-F: GGAACCCTCTCTCCCTCATC (CT)2CA(CT)6AA(CT)3 AY237768

PM156-R: CATTGAAGCTCGCCTGAGA

PM162-F: TATGCTTTTACCACACCAAACTT (GAA)5, (GA)8 AY237770

PM162-R: ACATTTTCACACAATACAACCCTCT

PM164-F: ATTGGTGAAGCCTGGAG (GA)11 AY237771

PM164-R: GGGGTATCATAATCTTGC

PM170-F: GCCCAATGATGGACAGACA (CT)9, (ATTT)7 AY237772

PM170-R: TCAGACTTCTTGCACCATCC

PM176-F: CACAAACGGCTGGTCAATC (CT)38 AY237773

PM176-R: CAAGAGAGAGAGAGAGAGAGAGAGAGA

PM181-F: GATGTCCATCGTGGTCACTG (CT)5AT(CT)7, AY237775

PM181-R: CGATCTTTCCTCACACAGCA (CT)3CAT(CT)7

PM183-F: P TTCTAATGAAAACCGACAAGTTT (CT)24 AY237776

PM183-R: CGTGCCAATAGAGTTTTATACGG

PM188-F: P GGGCTTCACTGCTTTTGATT (GA)8 AY237777

PM188-R: TGCGACTTCTGAGAGGACAA

PM200-F: P GCTATGTGGGAAAAATACTGCTT (CT)22(CA)16 AY237778

PM200-R: CAGATGTGTGTGTGTGTGTGTG

PM201-F: P CCTTTATAGAGGACCTTCCCTCTC (CT)19 AY237779

PM201-R: GCCTATTTGGTATCGGCTCA

PM204-F: P TGGGCCTAAACCCAACCTAT (GA)20 AY237780

PM204-R: CCACAAACAGTGCAGCAATC

PM208-F: AGTGCTGGTTTGCAGTTCG (CCT)2(CTT)3(CCT)2 AY237781

PM208-R: CACACGGTATAGAAGGGAAGAG

PM209-F: CAAGAACATGGGGATGAAGAG (GA)53 AY237782

PM209-R: TACGCATTCTTTGTGCGACT

PM210-F: P CCGCAGATCTTCTCCTGTGT (CT)25 AY237783

PM210-R: CCTCCTCATCCTCTAAACTCTGC

PM213-F: CCCTCTCGTTGAATCACGTC (CTT)2(CT)2, (CCT)3 AY237784

PM213-R: TTGATCAACCTTTGCCTTACG

PM216-F: GACCTTATGCATTGATGTTCTTG (TA)3(GAAA)3 AY237785

PM216-R: CCCATTTTCCCACTTTTTCA

PM219-F: CTCTGCGACTCAACAACCAA (CTTGTAA)2 AY237786

PM219-R: TTGAAATTCCCCGCATCTAC

PM225-F: CTCTCTCCCCTCGGTTCTCT (CT)11 AY237788

PM225-R: TTCCCCAATACCCAGCAATA

PM228-F: CCTCAAGTTACTCTCTTTCTCACTCTC (CTCA)3(CT)2 AY237789

PM228-R: TTTGATCATTGGAGTCCACAA

PM230-F: GCATTGCTCAATGATGAATAACA (CT)17, (A)13 AY237790

PM230-R: ATCTTCCACACCGCCATTT

PM238-F: P CTCTCCTCTGCTCTGCACTG (CT)11 AY237791

PM238-R: ACAAGAACATGGGGATGAAGA

PM243-F: TCTCCTCTTCTTTCCCTCCA (CT)9 AY237792

PM243-R: TGGGAAGAAGCATAACAATGG

PM244-F: AACCAAATCACTTTCATTCATTCA (GA)74 AY237793

PM244-R: AAGCCTTCCATTCTTCCTCA

PM247-F: CATTACACGTCACCTCTCTCTCTC (CT)13(CA)14 AY237794

PM247-R: GTTGATAGCCATGCTGGAACT

PM293-F: TCGACGGTGCAAGTCAATAA (CT)21 AY237796

PM293-R: AACCAAATCACTTTCATTCATTCA

PM296-F: CTGGAAATGGAGGGAAGAGA (GGAGA)4(GA)3 AY237798

PM296-R: TGAATGGATAGATGAGTGACACG

* indicates a polymorphism detected among 24 genotypes of peanut.
